# Supplementary material for: Ammonia capture from the gas phase by encapsulated ionic liquids (ENILs)
Source: Royal Society of Chemistry journal article supplement (doi:10.1039/c6ra11685j), 2016-01-01
Supplement: c6ra11685j1.pdf [file c6ra11685j1.pdf]

### Supplementary Information

“Ammonia Capture from Gas Phase by Encapsulated Ionic Liquids” by J. Lemus, J. Bedia, C. Moya, N. Alonso-Morales, Miguel A. Gilarranz, J. Palomar\*, J.J. Rodriguez.

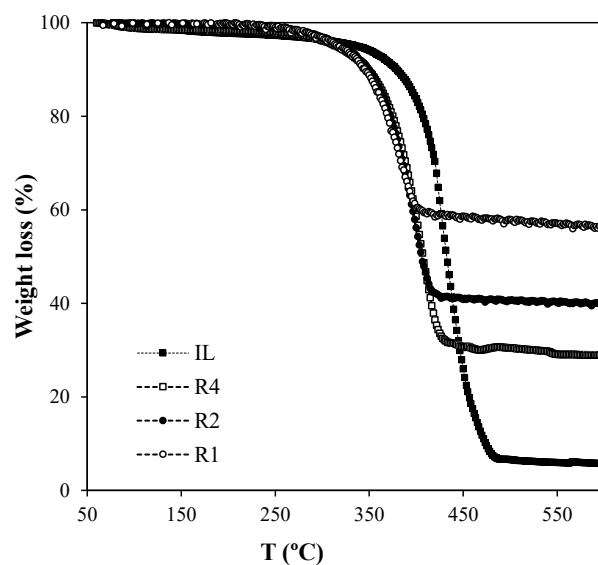

**Figure S1.** Dynamic thermogravimetric curve (TGA) of ENIL-R<sub>n</sub> prepared with EtOHmimBF<sub>4</sub> and neat EtOHmimBF<sub>4</sub> (nitrogen atmosphere, 10 °C·min<sup>-1</sup>).

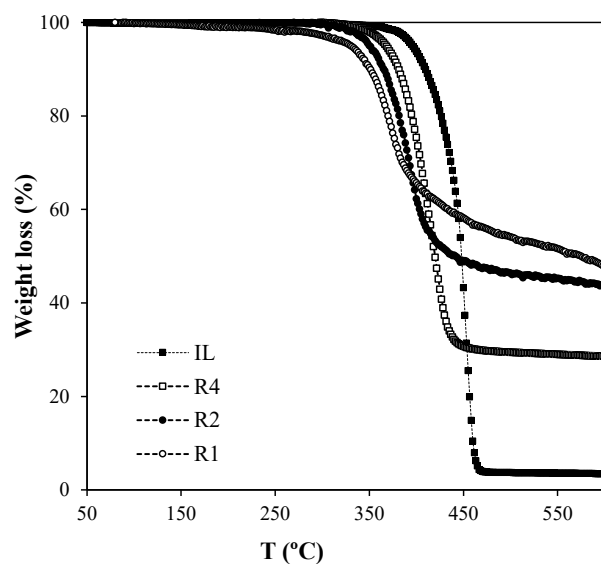

**Figure S2.** Dynamic thermogravimetric curve (TGA) of ENIL-R<sub>n</sub> prepared with CholineNTf<sub>2</sub> and neat CholineNTf<sub>2</sub> (nitrogen atmosphere, 10 °C·min<sup>-1</sup>).

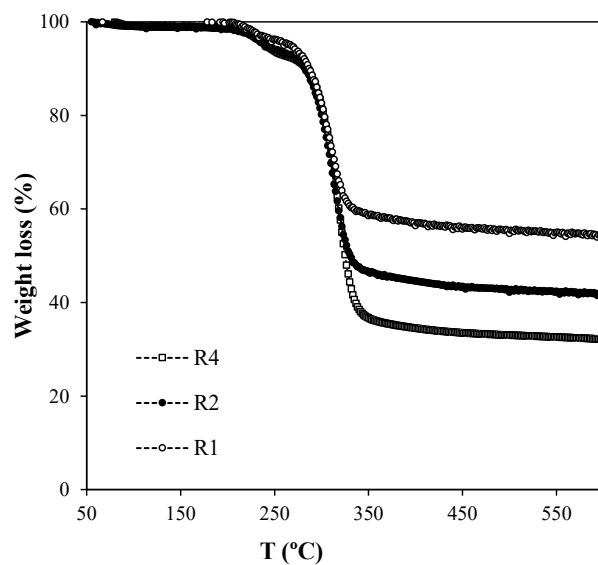

**Figure S3.** Dynamic thermogravimetric curve (TGA) of ENIL-R<sub>n</sub> prepared with (EtOH)<sub>3</sub>MeNMeSO<sub>4</sub> (nitrogen atmosphere, 10 °C·min<sup>-1</sup>).

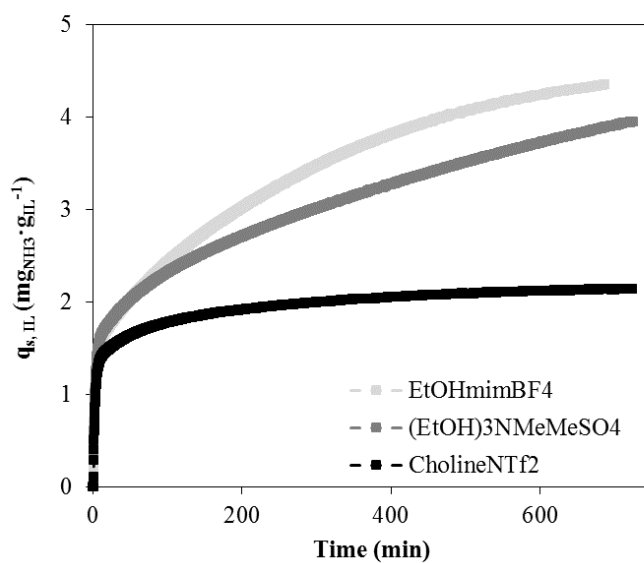

**Figure S4.** Experimental NH<sub>3</sub> absorption curves for ILs, (■) EtOHmimBF<sub>4</sub>, (■) (EtOH)<sub>3</sub>MeNMeSO<sub>4</sub> and (■) CholineNTf<sub>2</sub> (2000 ppmv of inlet NH<sub>3</sub> concentration, 50 mL·min<sup>-1</sup>, 500 mg of IL, 30 °C.\*

\*Ammonia absorption experiments were carried out in a TGA analyzer (Mettler Toledo Instrument, TGA/SDTA851e model) with a weight range of 0–1000 mg and a resolution of 0.1 mg. The temperature of the sample was maintained at 30°C using a regulated external bath (Huber minisat 125).

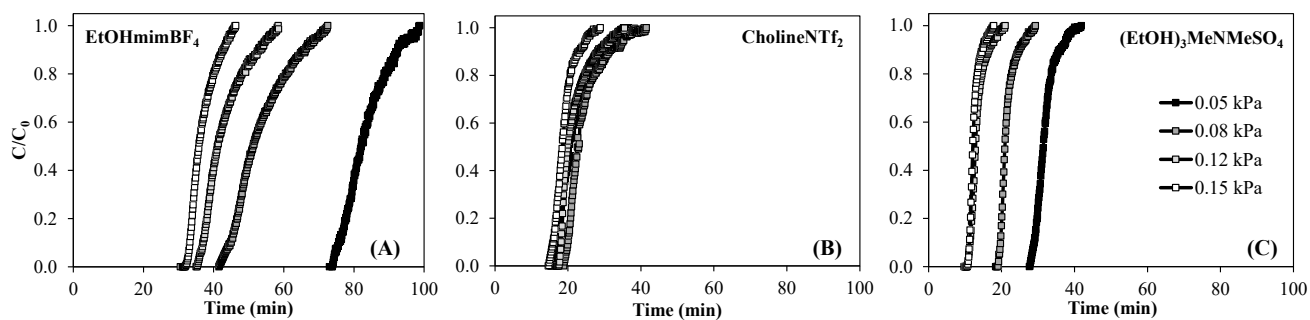

**Figure S5.** Experimental breakthrough curves of obtained at different inlet  $\text{NH}_3$  concentration and ENILs-R<sub>4</sub> prepared with (A) EtOHmimBF<sub>4</sub>, (B) CholineNTf<sub>2</sub> and (C) (EtOH)<sub>3</sub>MeNMeSO<sub>4</sub> ( $20 \text{ mL} \cdot \text{min}^{-1}$ , bed length: 5 cm, 30 °C).
